# Supplementary figures and images for: Single-domain antibody inhibitors target the coiled coil arms of the Bacillus subtilis SMC complex
Source: eLife journal article supplement (doi:10.7554/elife.111131), 2026-05-19

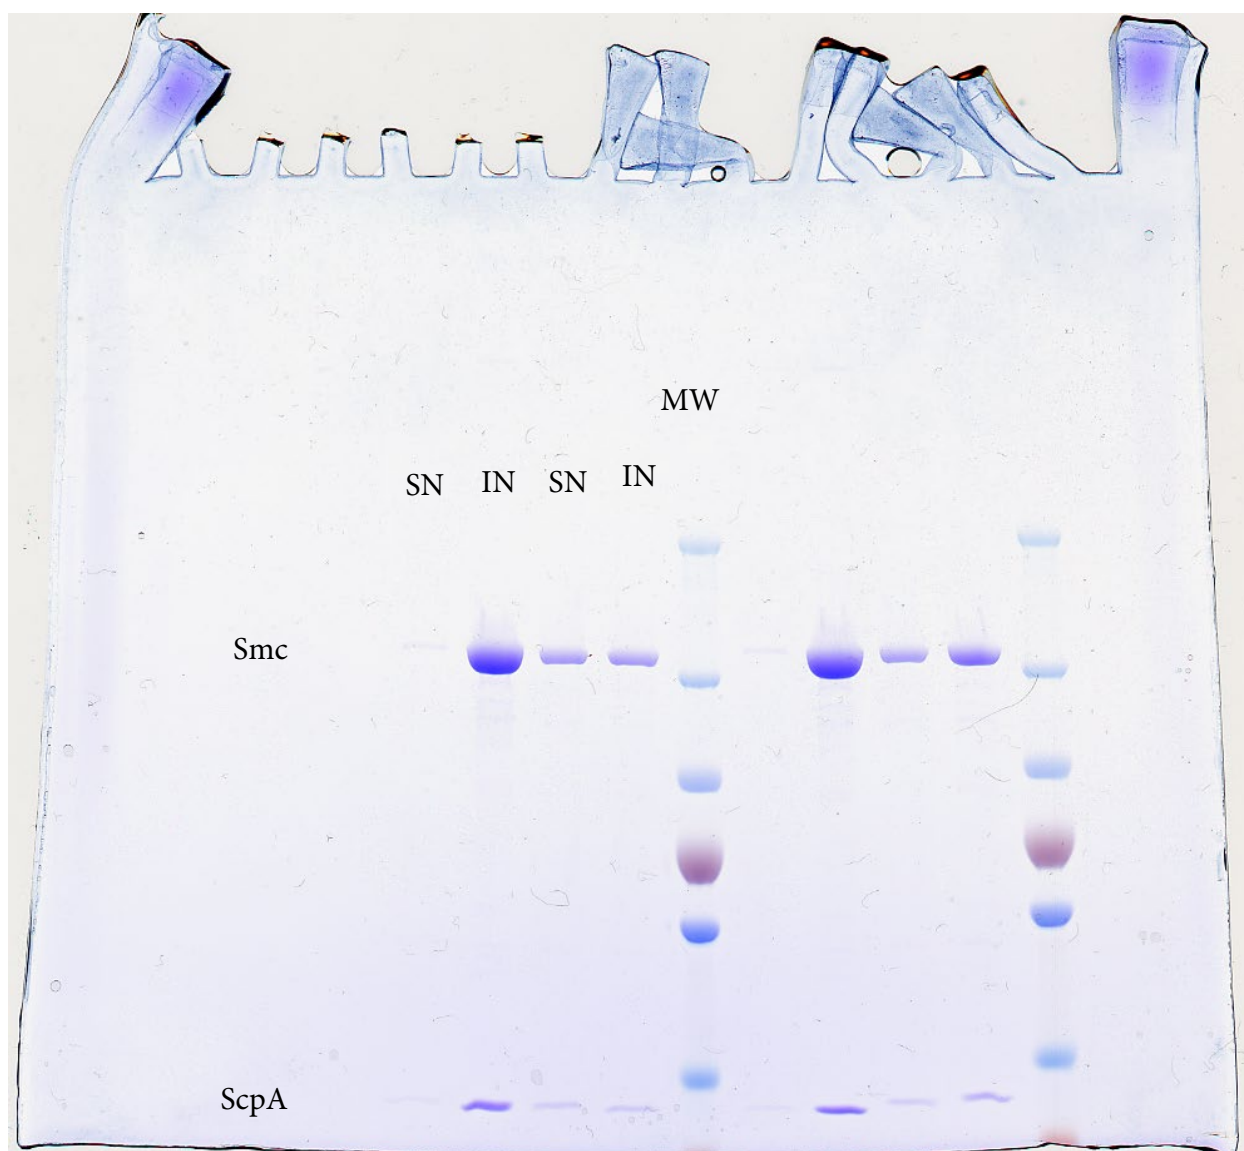

Supplement: fig1-figsupp1-data2 [file Source data 2.pdf › Source data 2.pdf]
